# Supplementary material for: Conserved autism-associated genes tune social feeding behavior in C. elegans
Source: PubMed Central journal article supplement — Nat Commun. 2024 Oct 28;15:9301. doi: 10.1038/s41467-024-53590-x (PMC11519495; doi:10.1038/s41467-024-53590-x), 2024-10-28
Supplement: 41467_2024_53590_MOESM1_ESM.pdf [file 41467_2024_53590_MOESM1_ESM.pdf]

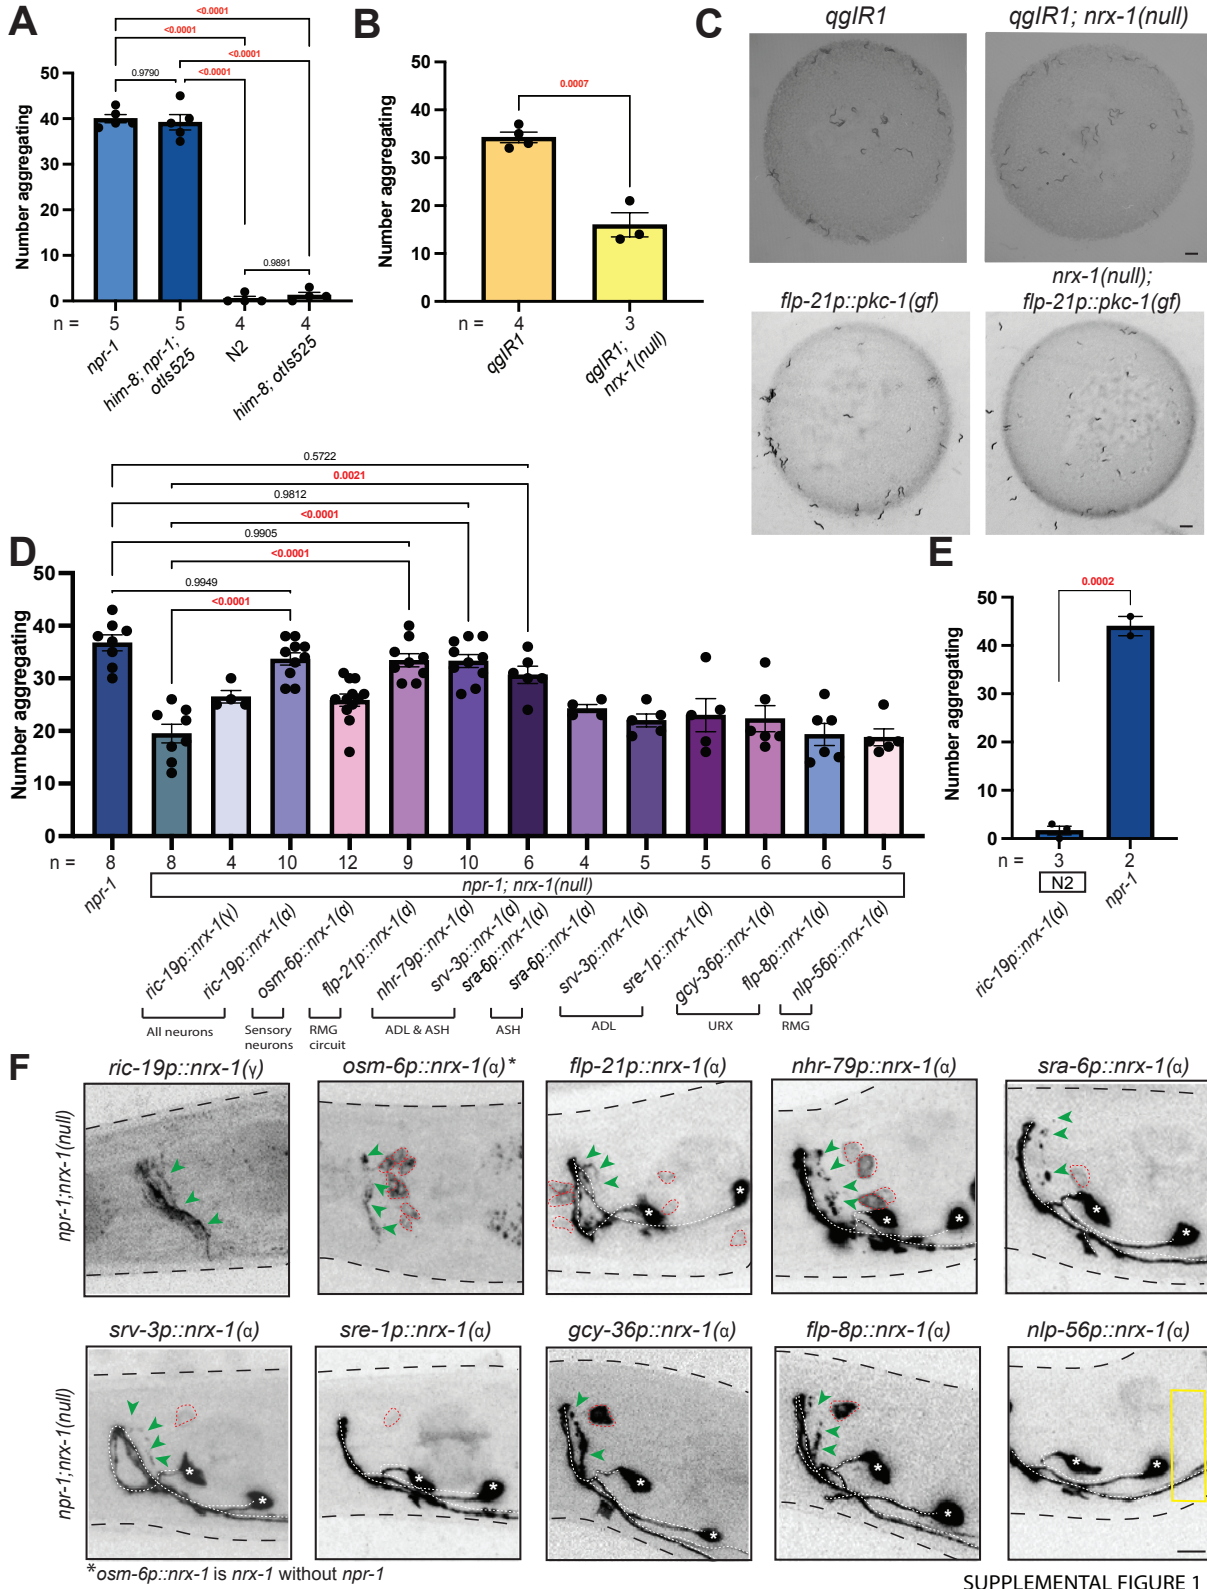

SUPPLEMENTAL FIGURE 1

**Supplemental Fig. 1. Confirming role for, expression, and localization, of NRX-1 in aggregation behavior**

**A)** Graph showing aggregation behavior levels in *npr-1(ad609)* animals compared to *npr-1(ad609); otIs525;him-8* animals and N2 compared to *otIs525;him-8*. Aggregation behavior was not changed by the presence of *otIs525* or *him-8*. Graph showing number of aggregating animals **(B)** and representative images (Scale bar = 10 $\mu$ m) **(C)** of QG1 (*qgIR1*) strain compared to *qgIR1;nrx-1(wy778);otIs525;him-8* mutants and representative images of aggregation behavior in *flp-21p::pkc-1(gf)* and *flp-21p::pkc-1(gf);nrx-1(wy778)* animals (Scale bar = 1mm). **D)** Graph showing number of aggregating animals in *npr-1(ad609)*, *npr-1(ad609);nrx-1(wy778)*, and *npr-1(ad609);nrx-1(wy778)* animals with NRX-1( $\gamma$ ) driven under the *ric-19* promoter and NRX-1( $\alpha$ ) driven under promoters indicated. **E)** Graph showing number of aggregating animals in solitary controls with NRX-1( $\alpha$ ) driven under the *ric-19* promoter and *npr-1(ad609)* animals. **F)** Expression of NRX-1 tagged with sfGFP driven under various promoters. Green arrows indicate NRX-1 axonal expression. Red dashed lines show cell bodies. White dashed line indicates *lim-6<sup>int4</sup>::gfp* which drives expression in RIS and AVL axons. White asterisks indicate RIS and AVL cell bodies. Yellow box in *nlp-56p::nrx-1( $\alpha$ )* indicates area where RMG should be located. Expression of *nrx-1* under this promoter is not seen. *osm-6p::nrx-1( $\alpha$ )* imaging performed in *nrx-1(wy778)*. Data shown in Supplemental Fig. 1E expand on that shown in Fig. 2 B and E. Number of biological replicates (n) are displayed in figure, bars show the mean number of aggregating *C. elegans*, error bars indicate SEM. One-way ANOVA with Tukey's post-hoc test was used for comparisons (t-test for panels B & E), exact p-values are shown on graphs (red indicates significance, black indicates non-significance). Source data are provided in the Source Data file.

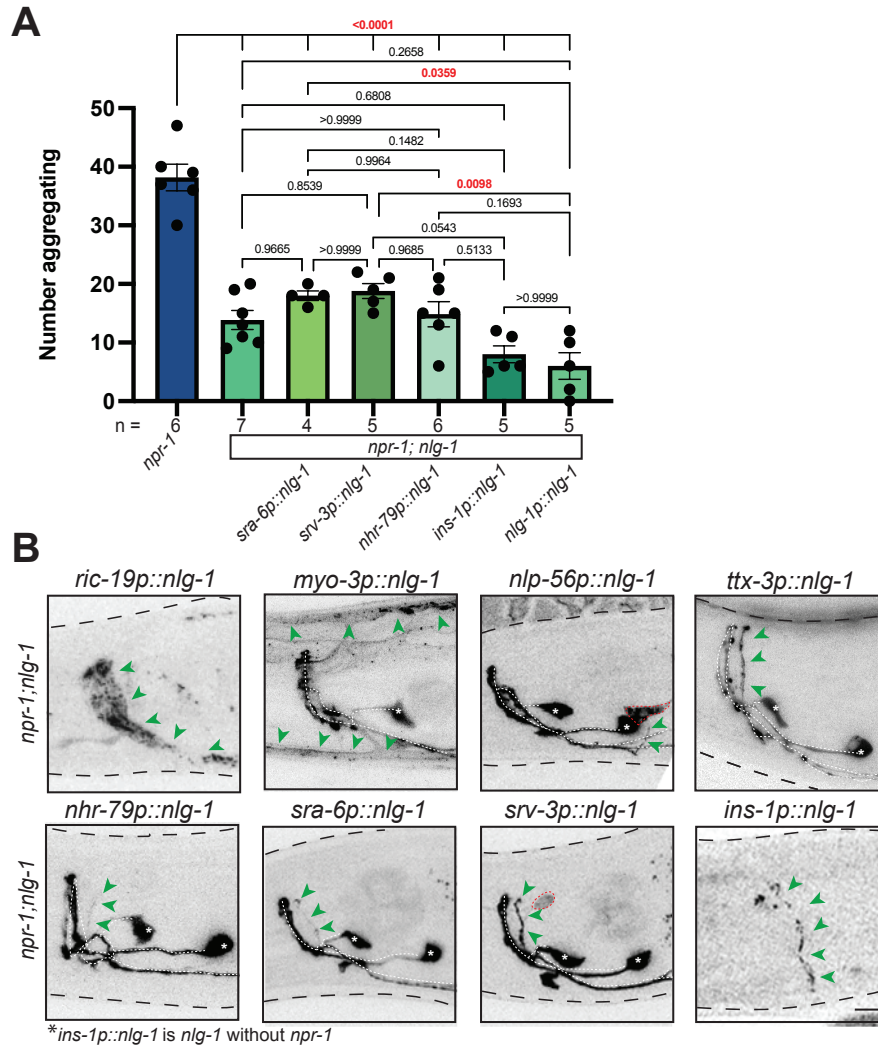

SUPPLEMENTAL FIGURE 2

**Supplemental Fig. 2. Expression and localization of NLG-1 in aggregation behavior**

**A)** Graph showing number of aggregating animals in *npr-1(ad609)*, *npr-1(ad609);nlg-1(ok259)*, and *npr-1(ad609);nlg-1(ok259)* with NLG-1 driven under *sra-6*, *srv-3*, *nhr-79*, *ins-1*, and *nlg-1* promoters. **B)** Expression of NLG-1 tagged with sfGFP (or GFP for *nlg-1p*) driven under various promoters. Green arrows indicate NLG-1 axonal or muscle expression. Red dashed lines show cell bodies. White dashed line indicates *lim-6<sup>int4</sup>::gfp* which drives expression in RIS and AVL axons. White asterisks indicate RIS and AVL cell bodies (Scale bar = 10 $\mu$ m). Data for *npr-1* and *npr-1;nlg-1* are replotted in Supplemental Fig. 2A from Figure 3. Number of biological replicates (n) are displayed in figure, bars show the mean number of aggregating *C. elegans*, error bars indicate SEM. One-way ANOVA with Tukey's post-hoc test was used for comparisons, exact p-values are shown on graphs (red indicates significance, black indicates non-significance). Source data are provided in the Source Data file.

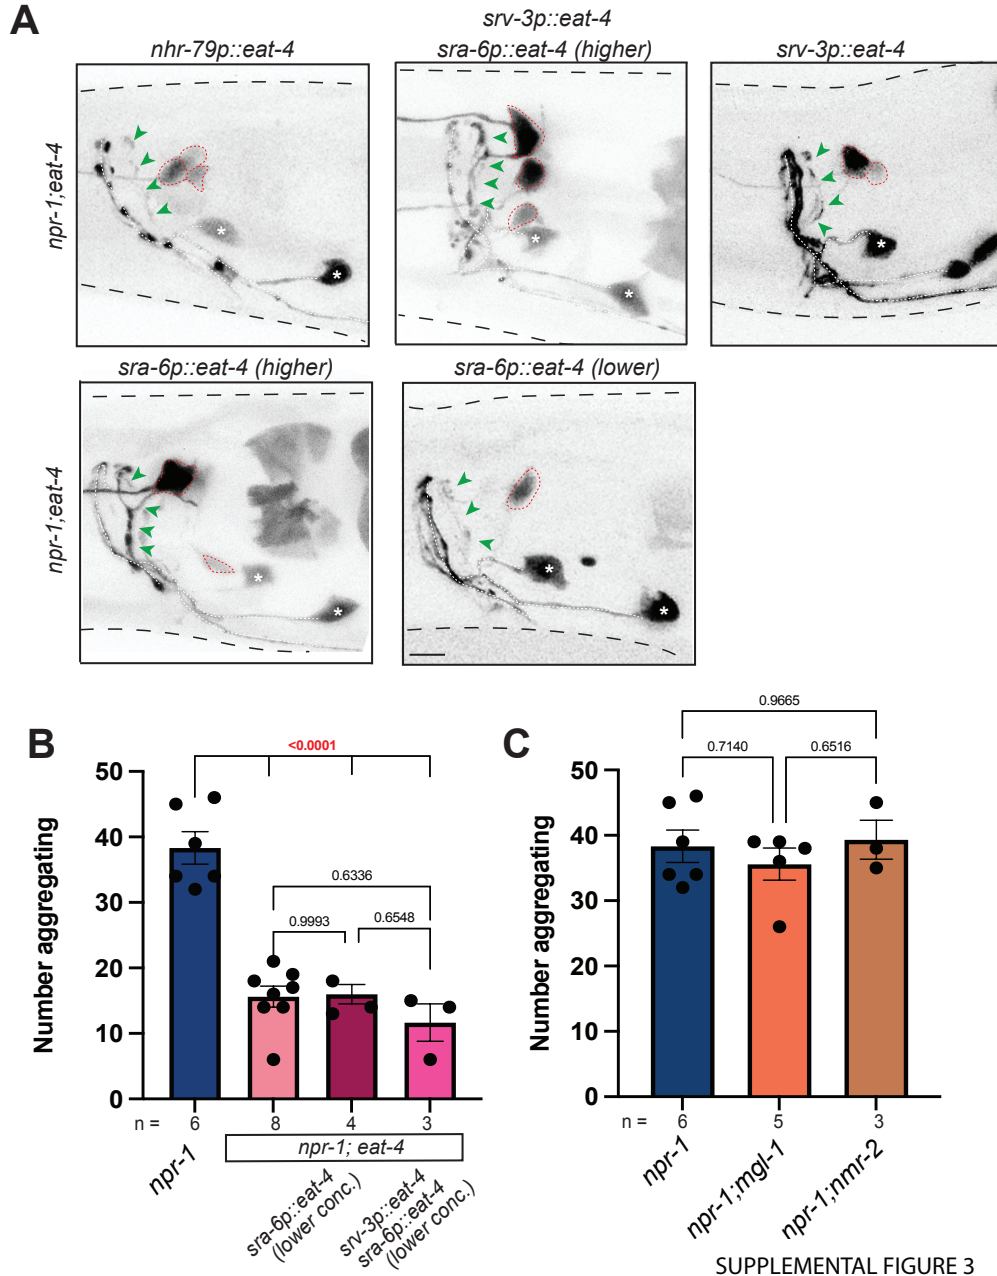

SUPPLEMENTAL FIGURE 3

**Supplemental Fig. 3. Expression of EAT-4 and analysis of glutamate receptors in aggregation behavior**

**A)** Expression of EAT-4 tagged with sfGFP driven under *nhr-79p*, *srv-3p*, *sra-6p(higher)*(injected at 40 ng  $\mu\text{l}^{-1}$ ), *sra-6p(lower)*(injected at 20 ng  $\mu\text{l}^{-1}$ ), and *srv-3p/sra-6p higher combined*. Green arrows indicate NRX-1 axonal expression. Red dashed lines show cell bodies. White dashed line indicates *lim-6<sup>int4</sup>::gfp* which drives expression in RIS and AVL axons. White asterisks indicate RIS and AVL cell bodies (Scale bar = 10 $\mu\text{m}$ ). **B)** Graph showing number of aggregating animals in *npr-1(ad609)*, *npr-1(ad609);eat-4(ky5)*, *npr-1(ad609);eat-4(ky5);sra-6p(lower)::eat-4*, *npr-1(ad609);eat-4(ky5);srv-3p::eat-4;sra-6p(lower)::eat-4*. **C)** Graph showing number of aggregating animals in *npr-1(ad609)*, *npr-1(ad609);mgl-1(tm1811)* and *npr-1(ad609);nmr-*

2(ok3324). Data for *npr-1* and *npr-1;eat-4* in Supplemental Fig. 3B and C are replotted from Figure 4. Number of biological replicates (n) are displayed in figure, bars show the mean number of aggregating *C. elegans*, error bars indicate SEM. One-way ANOVA with Tukey's post-hoc test was used for comparisons, exact p-values are shown on graphs (red indicates significance, black indicates non-significance). Source data are provided in the Source Data file.

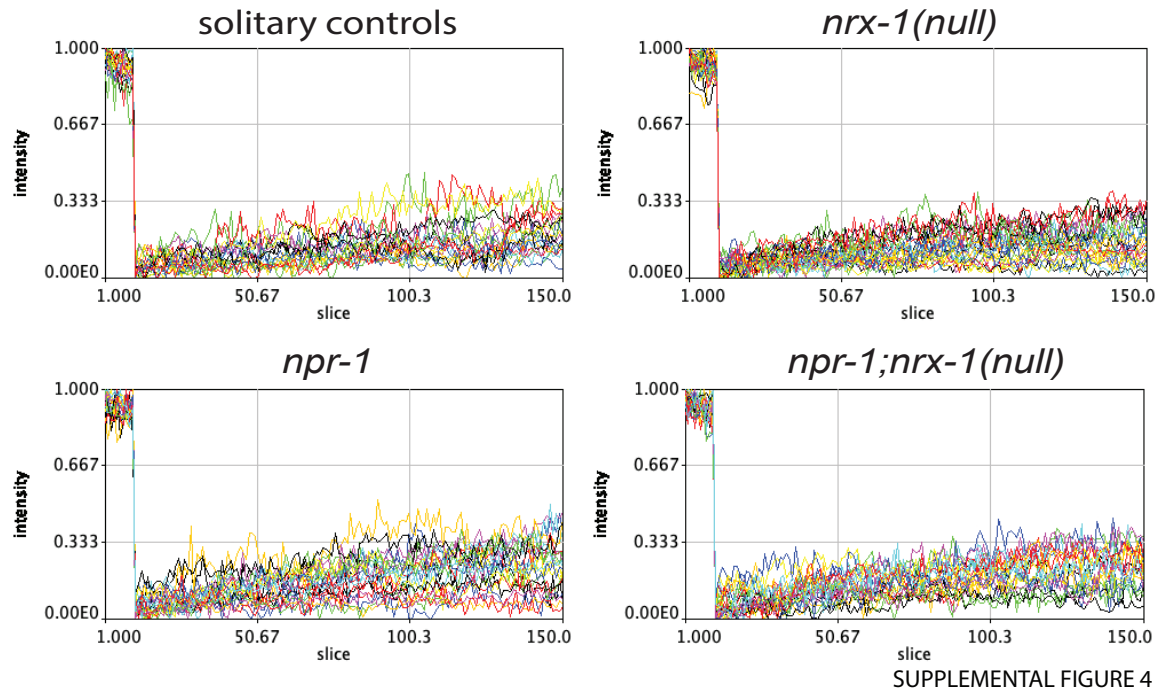

**Supplemental Fig. 4. Individual slopes for FRAP of ASH::eat-4::phluorin.**

Graphs of ASH::eat-4::phluorin tracings for all animals included in analysis showing pre-bleach post-bleach and recovery with minimum and maximum set to 0 and 1 respectively in solitary controls, *nrx-1(wy778)*, *npr-1(ad609)*, and *nrx-1(wy778);npr-1(ad609)*.



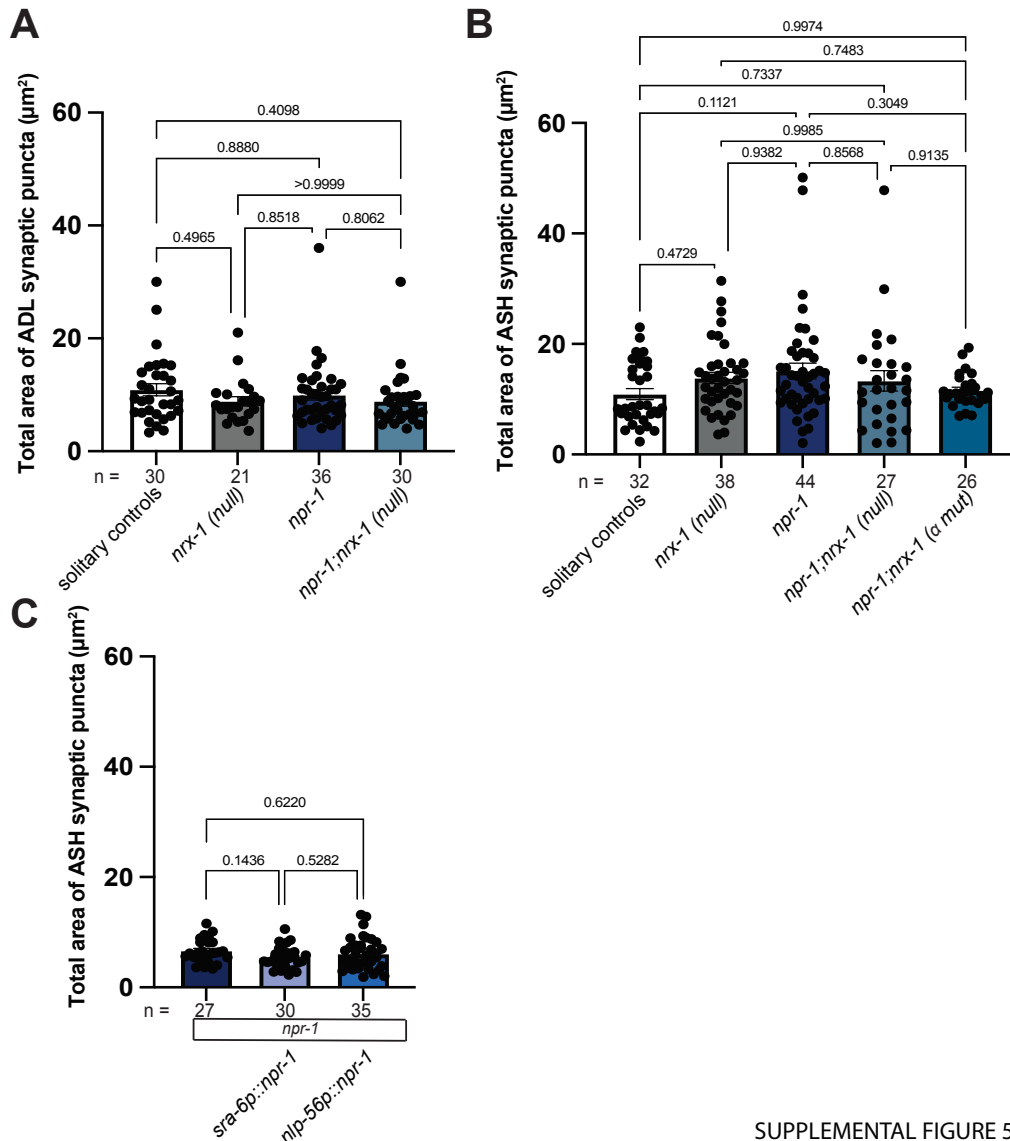

SUPPLEMENTAL FIGURE 5

**Supplemental Fig. 5. Areas of ADL and ASH pre-synaptic puncta.**

**A)** Graphs showing area of *srv-3p::cla-1::gfp* puncta in ADL in solitary controls, *nrx-1(wy778)*, *npr-1(ad609)*, and *npr-1(ad609);nrx-1(wy778)* mutants. **B)** Graph showing area of *sra-6p::cla-1::gfp* puncta in ASH in solitary controls, *nrx-1(wy778)*, *npr-1(ad609)*, *npr-1(ad609);nrx-1(wy778)* mutants, and *npr-1(ad609);nrx-1(gk246237)* mutants. **C)** Graph showing area of *sra-6p::cla-1::gfp* puncta in ASH in *npr-1(ad609)*, *npr-1(ad609); sra-6p::npr-1* (ASH), and *npr-1(ad609); nlp-56p::npr-1* (RMG). Number of biological replicates (n) are displayed in figure, bars show the mean number of aggregating *C. elegans*, error bars indicate SEM. One-way ANOVA with Tukey's post-hoc test was used for comparisons, exact p-values are shown on graphs (red indicates significance, black indicates non-significance). Source data are provided in the Source Data file.

**Supplementary table 1. Conservation of *C. elegans* genes with human autism-associated genes**

| <i>C. elegans</i> gene | Human gene    | SFARI rank | EAGLE score | ~identity (%) |
|------------------------|---------------|------------|-------------|---------------|
| <i>nrx-1</i>           | <i>NRXN1</i>  | 1          | 143.75      | 27            |
|                        | <i>NRXN2</i>  | 1          | 7           | 24            |
|                        | <i>NRXN3</i>  | 1          | 11.1        | 24            |
| <i>nlg-1</i>           | <i>NLGN3</i>  | 1          | 6.5         | 29            |
|                        | <i>NLGN4X</i> | 1          | 12          | 29            |
|                        | <i>NLGN2</i>  | 1          | 3           | 27            |
|                        | <i>NLGN4Y</i> | 2          | /           | 28            |
| <i>glr-1</i>           | <i>NLGN1</i>  | 2          | /           | 28            |
|                        | <i>GRIA2</i>  | 1          | 12          | 37            |
|                        | <i>GRIA3</i>  | S          | /           | 37            |
| <i>glr-2</i>           | <i>GRIA1</i>  | 2          | /           | 37            |
|                        | <i>GRIA2</i>  | 1          | 12          | 37            |
|                        | <i>GRIA3</i>  | S          | /           | 35            |
| <i>avr-15</i>          | <i>GRIA1</i>  | 2          | /           | 37            |
|                        | <i>GLRA2</i>  | 2          | /           | 39            |
|                        | <i>GABRA3</i> | S          | /           | 32            |
|                        | <i>GABRB2</i> | 1          | 0.3         | 31            |
|                        | <i>GABRB3</i> | 1          | /           | 32            |
|                        | <i>GABRA4</i> | 2          | /           | 30            |

Note: Conservation identified from homology searches on flybase, ortholist2, and previous publications. SFARI rank and EAGLE score from SFARI gene. % identity from DIOPT alignments of amino acid sequences

**Supplementary Table 2. *C. elegans* strains by Figure**

| Figure | Figure reference                                               | Strain identifier | Genotype                                                                                                                                                                           | Source             | injection concentration |
|--------|----------------------------------------------------------------|-------------------|------------------------------------------------------------------------------------------------------------------------------------------------------------------------------------|--------------------|-------------------------|
| 1      | <i>npr-1</i>                                                   | MPH39             | <i>him-8(e1489) IV; npr-1(ad609) X; otIs525[lim-6int4::gfp]</i>                                                                                                                    | Hart Lab           |                         |
|        | <i>npr-1</i>                                                   | DA609             | <i>npr-1(ad609) X</i>                                                                                                                                                              | CGC                |                         |
|        | <i>nrx-1(null); npr-1</i>                                      | MPH40             | <i>unc-119(ed3) III; him-8(e1489) IV; nrx-1(wy778[unc-119(+)] V; npr-1(ad609) X; otIs525[lim-6int4::gfp]</i>                                                                       | Hart Lab           |                         |
|        | <i>nrx-1(null); npr-1</i>                                      | MPH49             | <i>unc-119(ed3) III; nrx-1(wy778[unc-119(+)] V; npr-1(ad609) X</i>                                                                                                                 | this study         |                         |
|        | <i>nrx-1(<math>\alpha</math> mut); npr-1</i>                   | MPH50             | <i>him-8(e1489) IV; nrx-1(gk246237) V; npr-1(ad609) X; otIs525[lim-6int4::gfp]</i>                                                                                                 | this study         |                         |
|        | <i>nrx-1(<math>\alpha</math> del); npr-1</i>                   | MPH51             | <i>nrx-1(nu485) V; npr-1(ad609) X</i>                                                                                                                                              | this study         |                         |
|        | solitary controls                                              | OH15098           | <i>him-8(e1489) IV; otIs525[lim-6int4::gfp]</i>                                                                                                                                    | Hart & Hobert 2018 |                         |
|        | <i>nrx-1(null)</i>                                             | TV13570           | <i>unc-119(ed3) III; nrx-1(wy778[unc-119(+)] V</i>                                                                                                                                 | CGC                |                         |
|        | <i>nrx-1(<math>\alpha</math> mut)</i>                          | OH15116           | <i>him-8(e1489) IV; nrx-1(gk246237) V; otIs525[lim-6int4::gfp]</i>                                                                                                                 | Hart & Hobert 2018 |                         |
|        | <i>nrx-1(<math>\alpha</math> del)</i>                          | TV22997           | <i>nrx-1(nu485) V</i>                                                                                                                                                              | Tong et al. 2017   |                         |
|        | <i>flp-21p::pkc-1(gf)</i>                                      | CX10252           | <i>kyEx2385[flp-21p::pkc-1(gf)::sl2::gfp; ofm-1p::dsred]</i>                                                                                                                       | Bargmann lab       |                         |
|        | <i>nrx-1(null); flp-21p::pkc-1(gf)</i>                         | MPH98             | <i>unc-119(ed3) III; nrx-1(wy778[unc-119(+)] V; npr-1(ad609) X; kyEx2385[flp-21p::pkc-1(gf)::sl2::gfp; ofm-1p::dsred]</i>                                                          | this study         |                         |
| 2      | <i>npr-1; nrx-1(null); ric-19p::nrx-1(<math>\gamma</math>)</i> | MPH52             | <i>unc-119(ed3) III; nrx-1(wy778[unc-119(+)] V; npr-1(ad609) X; hpmEx3[ric-19p::sfGFP::nrx-1(<math>\gamma</math>); ttx-3p::mCherry]</i>                                            | this study         |                         |
|        | <i>npr-1; nrx-1(null); ric-19p::nrx-1(<math>\alpha</math>)</i> | IV870             | <i>unc-119(ed3) III, him-8(e1489) IV; nrx-1(wy778[unc-119(+)] V; npr-1(ad609) X; otIs525[lim-6int4::gfp]; ueEx601[ric-19p::sfGFP::nrx-1(<math>\alpha</math>); unc-122p::dsRed]</i> | this study         |                         |
|        | <i>npr-1; nrx-1(null); flp-21p::nrx-1(<math>\alpha</math>)</i> | IV874             | <i>unc-119(ed3) III, him-8(e1489) IV; nrx-1(wy778[unc-119(+)] V; npr-1(ad609) X; otIs525[lim-6int4::gfp]; ueEx605[flp-21p::sfGFP::nrx-1(<math>\alpha</math>); unc-122p::dsRed]</i> | this study         |                         |
|        | <i>npr-1; nrx-1(null); nhr-79p::nrx-1(<math>\alpha</math>)</i> | IV878             | <i>unc-119(ed3) III, him-8(e1489) IV; nrx-1(wy778[unc-119(+)] V; npr-1(ad609) X; otIs525[lim-6int4::gfp]; ueEx609[nhr-79p::sfGFP::nrx-1(<math>\alpha</math>); unc-122p::dsRed]</i> | this study         |                         |
|        | <i>npr-1; nrx-1(null); ric-19p::nrx-1(<math>\alpha</math>)</i> | MPH53             | <i>unc-119(ed3) III; nrx-1(wy778[unc-119(+)] V; npr-1(ad609) X; ueEx611[ric-19p::sfGFP::nrx-1(<math>\alpha</math>); unc-122p::dsRed]</i>                                           | this study         |                         |
|        |                                                                |                   |                                                                                                                                                                                    |                    |                         |



|   |                                                                                                   |        |                                                                                                                                                                                   |            |                |
|---|---------------------------------------------------------------------------------------------------|--------|-----------------------------------------------------------------------------------------------------------------------------------------------------------------------------------|------------|----------------|
|   | <i>npr-1; nrx-1(null); nhr-79p::nrx-1(<math>\alpha</math>)</i>                                    | MPH54  | <i>unc-119(ed3) III; nrx-1(wy778[unc-119(+)] V; npr-1(ad609) X; ueEx609[nhr-79p::sfGFP::nrx-1(<math>\alpha</math>); unc-122::dsRed]</i>                                           | this study |                |
|   | <i>npr-1; nrx-1(null); srv-3p::nrx-1(<math>\alpha</math>)</i>                                     | MPH55  | <i>unc-119(ed3) III; nrx-1(wy778[unc-119(+)] V; npr-1(ad609) X, hpmEx9[srv-3p::sfGFP::nrx-1(<math>\alpha</math>); lin-44p::gfp]</i>                                               | this study |                |
|   | <i>npr-1; nrx-1(null); srv-3p::nrx-1(<math>\alpha</math>); sra-6p::nrx-1(<math>\alpha</math>)</i> | MPH56  | <i>unc-119(ed3) III; nrx-1(wy778[unc-119(+)] V; npr-1(ad609) X; hpmEx9[srv-3p::sfGFP::nrx-1(<math>\alpha</math>); lin-44p::gfp]</i>                                               | this study | 45 ng/ $\mu$ l |
|   | <i>npr-1; nrx-1(null); sra-6p::nrx-1(<math>\alpha</math>)</i>                                     | MPH57  | <i>unc-119(ed3) III; nrx-1(wy778[unc-119(+)] V; npr-1(ad609) X; him-8(e1489) IV; otls525[lim-6int4::gfp]; hpmEx10[sra-6p::sfGFP::nrx-1(<math>\alpha</math>); unc-122p::dsRed]</i> | this study | 45 ng/ $\mu$ l |
| 3 | <i>npr-1; nlg-1</i>                                                                               | MPH43  | <i>him-8(e1489) IV; npr-1(ad609) X; nlg-1(ok259) X; otls525[lim-6int4::gfp]</i>                                                                                                   | Hart Lab   |                |
|   | solitary controls                                                                                 | N2     | Bristol lab control strain                                                                                                                                                        | CGC        |                |
|   | <i>nlg-1</i>                                                                                      | VC228  | <i>nlg-1(ok259) X</i>                                                                                                                                                             | CGC        |                |
|   | <i>npr-1; nlg-1; ric-19p::nlg-1</i>                                                               | IV930  | <i>npr-1(ad609) X; nlg-1(ok259) X; ueEx645[ric-19p::sfGFP::nlg-1; lin-44p::gfp]</i>                                                                                               | this study |                |
|   | <i>npr-1; nlg-1; myo-3p::nlg-1</i>                                                                | MPH159 | <i>npr-1(ad609) X; nlg-1(ok259) X; hpmEx29[myo-3p::sfGFP::nlg-1; lin-44p::gfp]</i>                                                                                                | this study |                |
|   | <i>npr-1; nlg-1; nlp-56p::nlg-1</i>                                                               | MPH59  | <i>him-8(e1489) IV; npr-1(ad609) X; nlg-1(ok259) X; otls525[lim-6int4::gfp]; hpmEx12[nlp-56p::sfGFP::nlg-1; ttx-3p::mCherry]</i>                                                  | this study | 40 ng/ $\mu$ l |
|   | <i>npr-1; nlg-1; ttx-3p::nlg-1</i>                                                                | MPH160 | <i>npr-1(ad609) X; nlg-1(ok259) X; hpmEx30[ttx-3p::sfGFP::nlg-1; lin-44p::gfp]</i>                                                                                                | this study |                |
|   | <i>npr-1; nrx-1; nlg-1</i>                                                                        | MPH44  | <i>unc-119(ed3) III; him-8(e1489) IV; nrx-1(wy778[unc-119(+)] V; npr-1(ad609); nlg-1(ok259) X; otls525[lim-6int4::gfp]</i>                                                        | this study |                |
| 4 | <i>npr-1; eat-4</i>                                                                               | MPH60  | <i>eat-4(ky5) III; npr-1(ad609) X; otls525[lim-6int4::gfp]</i>                                                                                                                    | this study |                |
|   | <i>npr-1; eat-4; nhr-79p::eat-4</i>                                                               | MPH61  | <i>eat-4(ky5) III; npr-1(ad609) X; otls525[lim-6int4::gfp]; hpmEx13[nhr-79p::eat-4::SL2::gfp; ttx-3p::mCherry]</i>                                                                | this study |                |
|   | <i>npr-1; eat-4; srv-3p::eat-4</i>                                                                | MPH62  | <i>eat-4(ky5) III; npr-1(ad609) X; otls525[lim-6int4::gfp]; hpmEx14[srv-3p::eat-4::SL2::gfp; ttx-3p::mCherry]</i>                                                                 | this study |                |
|   | <i>npr-1; eat-4; sra-6p::eat-4</i>                                                                | MPH161 | <i>eat-4(ky5) III; npr-1(ad609) X; otls525[lim-6int4::gfp]; hpmEx31[sra-6p::eat-4::SL2::gfp; lin-44p::gfp]</i>                                                                    | this study | 40 ng/ $\mu$ l |

|   |                                                   |         |                                                                                                                                                                   |              |   |
|---|---------------------------------------------------|---------|-------------------------------------------------------------------------------------------------------------------------------------------------------------------|--------------|---|
|   | <i>npr-1; eat-4; srv-3p::eat-4; sra-6p::eat-4</i> | MPH162  | <i>eat-4(ky5) III; npr-1(ad609) X; otls525[lim-6int4::gfp]; hpmEx14[srv-3p::eat-4::SL2::gfp; ttx-3p::mCherry]; hpmEx32[sra-6p::eat-4::SL2::gfp; lin-44p::gfp]</i> | this study   |   |
|   | <i>npr-1; nrx-1; eat-4</i>                        | MPH64   | <i>eat-4(ky5) III; unc-119(ed3) III; nrx-1(wy778[unc-119(+)] V; npr-1(ad609) X; otls525[lim-6int4::gfp]</i>                                                       | this study   |   |
|   | <i>npr-1; nrx-1; eat-4; nhr-79p::eat-4</i>        | MPH65   | <i>eat-4(ky5) III; unc-119(ed3) III; nrx-1(wy778[unc-119(+)] V; npr-1(ad609) X; otls525[lim-6int4::gfp]; hpmEx13[nhr-79p::eat-4::SL2::gfp; ttx-3p::mCherry]</i>   | this study   |   |
|   | <i>npr-1; nrx-1; eat-4; nhr-79p::nrx-1(α)</i>     | MPH66   | <i>eat-4(ky5) III; unc-119(ed3) III; nrx-1(wy778[unc-119(+)] V; npr-1(ad609) X; ueEx609[nhr-79p::sfGFP::nrx-1(α); unc-122p::dsRed]</i>                            | this study   |   |
|   | <i>eat-4</i>                                      | MT6308  | <i>eat-4(ky5) III</i>                                                                                                                                             | CGC          |   |
|   | <i>npr-1; nlg-1; eat-4</i>                        | MPH67   | <i>eat-4(ky5) III; npr-1(ad609); nlg-1(ok259) X; otls525[lim-6int4::gfp]</i>                                                                                      | this study   |   |
|   | <i>npr-1; glr-1</i>                               | MPH68   | <i>glr-1(n2461) III; npr-1(ad609) X</i>                                                                                                                           | this study   |   |
|   | <i>npr-1; glr-2</i>                               | MPH69   | <i>glr-2(ok2342) III; npr-1(ad609) X</i>                                                                                                                          | this study   |   |
|   | <i>npr-1; nlg-1; glr-2</i>                        | MPH163  | <i>glr-2(ok2342) III; unc-119(ed3) III; npr-1(ad609) X; nlg-1(ok259) X; otls525[lim-6int4::gfp]</i>                                                               | this study   |   |
|   | <i>npr-1; avr-15</i>                              | MPH70   | <i>avr-15(ad1051) V; npr-1(ad609) X</i>                                                                                                                           | this study   |   |
|   | <i>npr-1; nrx-1; glr-1</i>                        | MPH71   | <i>glr-1(n2461) III; unc-119(ed3) III; nrx-1(wy778[unc-119(+)] V; npr-1(ad609) X; otls525[lim-6int4::gfp]</i>                                                     | this study   |   |
|   | <i>npr-1; nrx-1; glr-2</i>                        | MPH72   | <i>glr-2(ok2342) III; unc-119(ed3) III; nrx-1(wy778[unc-119(+)] V; npr-1(ad609) X; otls525[lim-6int4::gfp]</i>                                                    | this study   |   |
|   | <i>npr-1; nrx-1; avr-15</i>                       | MPH73   | <i>unc-119(ed3) III; nrx-1(wy778[unc-119(+)] avr-15(ad1051) V; npr-1(ad609) X; otls525[lim-6int4::gfp]</i>                                                        | this study   |   |
| 5 | solitary controls                                 | CX16921 | <i>kyls673[sra-6:eat-4::pHluorin; unc-122p:dsRed]</i>                                                                                                             | Bargmann lab | - |
|   | <i>nrx-1(null)</i>                                | MPH74   | <i>unc-119(ed3) III; nrx-1(wy778[unc-119(+)] V; kyls673[sra-6p:eat-4::pHluorin; unc-122p:dsRed]</i>                                                               | this study   |   |
|   | <i>npr-1</i>                                      | MPH75   | <i>npr-1(ad609) X; kyls673[sra-6:eat-4::pHluorin; unc-122p:dsRed]</i>                                                                                             | this study   |   |
|   | <i>npr-1; nrx-1(null)</i>                         | MPH76   | <i>unc-119(ed3) III; nrx-1(wy778[unc-119(+)] V; npr-1(ad609) X; kyls673[sra-6p:eat-4::pHluorin; unc-122p:dsRed]</i>                                               | this study   |   |
| 6 | solitary controls                                 | MPH77   | <i>hpmEx16[srv-3p::gfp::cla-1; lin-44p::gfp]</i>                                                                                                                  | this study   |   |
|   | <i>nrx-1(null)</i>                                | MPH78   | <i>unc-119(ed3) III; nrx-1(wy778[unc-119(+)] V; hpmEx16[srv-3p::gfp::cla-1; lin-44::gfp]</i>                                                                      | this study   |   |

|        |                                                                |        |                                                                                                                                                                                   |            |  |
|--------|----------------------------------------------------------------|--------|-----------------------------------------------------------------------------------------------------------------------------------------------------------------------------------|------------|--|
|        | <i>npr-1</i>                                                   | MPH79  | <i>npr-1(ad609) X; hpmEx16[srv-3p::gfp::cla-1; lin-44p::gfp]</i>                                                                                                                  | this study |  |
|        | <i>npr-1; nrx-1(null)</i>                                      | MPH80  | <i>unc-119(ed3) III; nrx-1(wy778[unc-119(+)] V; npr-1(ad609) X; hpmEx16[srv-3p::gfp::cla-1; lin-44::gfp]</i>                                                                      | this study |  |
|        | solitary controls                                              | MPH81  | <i>hpmEx17[sra-6:gfp::cla-1; lin-44p::gfp]</i>                                                                                                                                    | this study |  |
|        | <i>nrx-1(null)</i>                                             | MPH82  | <i>unc-119(ed3) III; nrx-1(wy778[unc-119(+)] V; hpmEx17[sra-6:gfp::cla-1; lin-44::gfp]</i>                                                                                        | this study |  |
|        | <i>npr-1</i>                                                   | MPH83  | <i>npr-1(ad609) X; hpmEx17[sra-6:gfp::cla-1; lin-44p::gfp]</i>                                                                                                                    | this study |  |
|        | <i>npr-1; nrx-1(null)</i>                                      | MPH84  | <i>unc-119(ed3) III; nrx-1(wy778[unc-119(+)] V; npr-1(ad609) X; hpmEx17[sra-6p:gfp::cla-1; lin-44p::gfp]</i>                                                                      | this study |  |
|        | <i>npr-1; nrx-1(<math>\alpha</math> mut)</i>                   | MPH85  | <i>nrx-1(gk246237) V; npr-1(ad609) X; hpmEx17[sra-6p:gfp::cla-1; lin-44p::gfp]</i>                                                                                                | this study |  |
|        | <i>npr-1; ASH::npr-1</i>                                       | MPH164 | <i>npr-1(ad609) X; hpmEx17[sra-6:gfp::cla-1; lin-44::gfp]; hpmEx33[sra-6p::npr-1::sl2::mCherry; unc-122p::dsRed]</i>                                                              | this study |  |
|        | <i>npr-1; RMG::npr-1</i>                                       | MPH165 | <i>npr-1(ad609) X; hpmEx17[sra-6:gfp::cla-1; lin-44::gfp]; hpmEx34[nlp-56p::npr-1::sl2::mCherry; unc-122p::dsRed]</i>                                                             | this study |  |
| Supp 1 | <i>qglR1</i>                                                   | QG1    | <i>qglR1 (X, CB4856&gt;N2, npr-1) X</i>                                                                                                                                           | this study |  |
|        | <i>qglR1; nrx-1(null)</i>                                      | MPH86  | <i>unc-119(ed3) III, him-8(e1489) IV; nrx-1(wy778[unc-119(+)] V; qglR1 (X, CB4856&gt;N2, npr-1) X; otIs525[lim-6int4::gfp]</i>                                                    | this study |  |
|        | <i>npr-1; ric-19p::nrx-1(<math>\alpha</math>)</i>              | MPH166 | <i>npr-1(ad609) X; ueEx601[ric-19p::sfGFP::nrx-1(<math>\alpha</math>); unc-122p::dsRed]</i>                                                                                       | this study |  |
|        | <i>npr-1; nrx-1(null); osm-6p::nrx-1(<math>\alpha</math>)</i>  | MPH87  | <i>unc-119(ed3) III; him-8(e1489) IV; nrx-1(wy778[unc-119(+)] V; npr-1(ad609) X; otIs525[lim-6int4::gfp]; ueEx603[osm-6p::sfGFP::nrx-1(<math>\alpha</math>); unc-122p::dsred]</i> | this study |  |
|        | <i>npr-1; nrx-1(null); sre-1p::nrx-1(<math>\alpha</math>)</i>  | MPH88  | <i>unc-119(ed3) III; him-8(e1489) IV; nrx-1(wy778[unc-119(+)] V; npr-1(ad609) X; otIs525[lim-6int4::gfp]; hpmEx18[sre-1p::sfGFP::nrx-1(<math>\alpha</math>); unc-122p::dsRed]</i> | this study |  |
|        | <i>npr-1; nrx-1(null); gcy-36p::nrx-1(<math>\alpha</math>)</i> | MPH89  | <i>unc-119(ed3) III; him-8(e1489) IV; nrx-1(wy778[unc-119(+)] V; npr-1(ad609) X; hpmEx19[gcy-36p::sfGFP::nrx-1(<math>\alpha</math>); unc-122p::dsRed]</i>                         | this study |  |
|        | <i>npr-1; nrx-1(null); flp-8::nrx-1(<math>\alpha</math>)</i>   | MPH90  | <i>unc-119(ed3) III; him-8(e1489) IV; nrx-1(wy778[unc-119(+)] V; npr-1(ad609) X; hpmEx20[flp-</i>                                                                                 | this study |  |

|        |                                                         |        |                                                                                                                                                                      |            |          |
|--------|---------------------------------------------------------|--------|----------------------------------------------------------------------------------------------------------------------------------------------------------------------|------------|----------|
|        |                                                         |        | <i>8p::sfGFP::nrx-1(α); unc-122p::dsRed]</i>                                                                                                                         |            |          |
|        | <i>npr-1; nrx-1(null); nlp-56p::nrx-1(α)</i>            | MPH91  | <i>unc-119(ed3) III; him-8(e1489) IV; nrx-1(wy778[unc-119(+)] V; npr-1(ad609) X; otIs525[lim-6int4::gfp]; hpmEx21[nlp-56p::sfGFP::nrx-1(α); ttx-3p::mCherry]</i>     | this study | 40 ng/μl |
|        | <i>npr-1; nrx-1(null); osm-6p::nrx-1(α)</i>             | MPH20  | <i>unc-119(ed3) III; nrx-1(wy778[unc-119(+)] V; ueEx603[osm-6p::sfGFP::nrx-1(α); unc-122p::dsred]</i>                                                                | this study |          |
|        | <i>npr-1; nrx-1(null); srv-3p::nrx-1(α)</i>             | MPH97  | <i>unc-119(ed3) III; him-8(e1489) IV; nrx-1(wy778[unc-119(+)] V; npr-1(ad609) X; otIs525[lim-6int4::gfp]; hpmEx24[srv-3p::sfGFP::nrx-1(α); lin-44::gfp]</i>          | this study |          |
| Supp 2 | <i>npr-1; nlg-1; sra-6p::nlg-1</i>                      | MPH93  | <i>him-8(e1489) IV; npr-1(ad609); nlg-1(ok259) X; otIs525[lim-6int4::gfp]; hpmEx22[sra-6p::sfGFP::nlg-1; lin-44p::gfp]</i>                                           | this study | 40 ng/μl |
|        | <i>npr-1; nlg-1; srv-3p::nlg-1</i>                      | MPH94  | <i>him-8(e1489) IV; npr-1(ad609); nlg-1(ok259) X; otIs525[lim-6int4::gfp]; hpmEx23[srv-3p::sfGFP::nlg-1; lin-44p::gfp]</i>                                           | this study | 40 ng/μl |
|        | <i>npr-1; nlg-1; nhr-79p::nlg-1</i>                     | MPH58  | <i>him-8(e1489)IV; npr-1(ad609) X; nlg-1(ok259) X; otIs525[lim-6int4::gfp]; hpmEx11[nhr-79p::sfGFP::nlg-1; lin-44p::gfp]</i>                                         | this study |          |
|        | <i>npr-1; nlg-1; ins-1p::nlg-1</i>                      | MPH92  | <i>npr-1(ad609); nlg-1(ok259) X; ueEx651[ins-1p::sfGFP::nlg-1; lin-44p::gfp]</i>                                                                                     | this study |          |
|        | <i>nlg-1; sra-6p::nlg-1</i>                             | IV937  | <i>nlg-1(ok259) X; ueEx651[ins-1p::sfGFP::nlg-1; lin-44p::gfp]</i>                                                                                                   | this study |          |
|        | <i>npr-1; nlg-1; nlg-1p::nlg-1</i>                      | MPH167 | <i>npr-1(ad609) X; nlg-1(ok259) X; vjls105[nlg-1p::GFP::nlg-1; ttx-3p::mCherry]</i>                                                                                  | this study |          |
| Supp 3 | <i>npr-1; eat-4; sra-6p::eat-4(lower)</i>               | MPH63  | <i>eat-4(ky5) III; npr-1(ad609) X; otIs525[lim-6int4::gfp]; hpmEx15[sra-6p::eat-4::SL2::gfp; ttx-3p::mCherry]</i>                                                    | this study |          |
|        | <i>npr-1; eat-4; srv-3::eat-4; sra-6p::eat-4(lower)</i> | MPH168 | <i>eat-4(ky5) III; npr-1(ad609) X; otIs525[lim-6int4::gfp]; hpmEx14[srv-3p::eat-4::SL2::gfp; ttx-3p::mCherry]; hpmEx15[sra-6p::eat-4::SL2::gfp; ttx-3p::mCherry]</i> | this study |          |
|        | <i>npr-1; nmr-2</i>                                     | MPH95  | <i>nmr-2(ok3324) V; npr-1(ad609) X</i>                                                                                                                               | this study |          |
|        | <i>npr-1; mgl-1</i>                                     | MPH96  | <i>mgl-1(tm1811) X; npr-1(ad609) X</i>                                                                                                                               | this study |          |

\* 20 ng/μl if not noted

**Supplementary Table 3. Plasmids and promoters**

| Identifier | Construct                                  | promoter forward primer            | promoter reverse primer            | promoter size | from       |
|------------|--------------------------------------------|------------------------------------|------------------------------------|---------------|------------|
| pMPH34     | <i>ric-19p::sfGF</i><br><i>P::nrx-1(a)</i> | CATTAAAGAGTGTGCTC<br>CACGAGCC      | GTTCAAAGTGAAGAGCT<br>CTCTCGAC      | 147           | Hart Lab   |
| pMPH35     | <i>ric-19p::sfGF</i><br><i>P::nrx-1(y)</i> | CATTAAAGAGTGTGCTC<br>CACGAGCC      | GTTCAAAGTGAAGAGCT<br>CTCTCGAC      | 147           | Hart Lab   |
| pMPH38     | <i>osm-6p::sfGFP</i><br><i>::nrx-1(a)</i>  | TCCATACGGCATCTGTT<br>GCATTC        | TGAAGGTAATAGCTTGA<br>AAGAGA        | 2082          | Hart Lab   |
| pMPH41     | <i>flp-21p::sfGF</i><br><i>P::nrx-1(a)</i> | TGAGGTCACGCAACTTG<br>ATGATCATTTTAT | GAAAATGACTTTTTGGAT<br>TTTGGAGCAATG | 4099          | this study |
| pMPH42     | <i>nhr-79p::sfGF</i><br><i>P::nrx-1(a)</i> | CACGATCATTTTAAGCC<br>AAGTTGTGGCCGT | TTTTATGCTAAAAATCGA<br>TAAATCAAGGAA | 3000          | this study |
| pMPH43     | <i>srv-3p::sfGFP</i><br><i>::nrx-1(a)</i>  | TCACATTTGCCACCAAA<br>TTGCCGGTTGCCA | TTTTGGAGGAGAAAGTT<br>GAGCAAATAGTAG | 770           | this study |
| pMPH44     | <i>sra-6p::sfGFP</i><br><i>::nrx-1(a)</i>  | CTGAGGTGCATTTGCGA<br>GGGGCACTTCAGA | GGCAAAATCTGAAATAAT<br>AAATATTAAATT | 2408          | this study |
| pMPH45     | <i>ric-19p::sfGF</i><br><i>P::nlg-1</i>    | CATTAAAGAGTGTGCTC<br>CACGAGCC      | GTTCAAAGTGAAGAGCT<br>CTCTCGAC      | 147           | this study |
| pMPH46     | <i>nhr-79p::sfGF</i><br><i>P::nlg-1</i>    | CACGATCATTTTAAGCC<br>AAGTTGTGGCCGT | TTTTATGCTAAAAATCGA<br>TAAATCAAGGAA | 3000          | this study |
| pMPH47     | <i>nlp-56p::sfGF</i><br><i>P::nlg-1</i>    | TTCCAAATCCGAACTTC<br>CAGCTCAAATGAC | CTGGAAGAGTTGAATCA<br>TATGTTTAGAAG  | 721           | this study |
| pMPH48     | <i>nhr-79p::eat-4::SL2::gf p</i>           | CACGATCATTTTAAGCC<br>AAGTTGTGGCCGT | TTTTATGCTAAAAATCGA<br>TAAATCAAGGAA | 3000          | this study |
| pMPH49     | <i>srv-3p::eat-4::SL2::gf p</i>            | TCACATTTGCCACCAAA<br>TTGCCGGTTGCCA | TTTTGGAGGAGAAAGTT<br>GAGCAAATAGTAG | 770           | this study |
| pMPH50     | <i>sra-6p::eat-4::SL2::gf p</i>            | CTGAGGTGCATTTGCGA<br>GGGGCACTTCAGA | GGCAAAATCTGAAATAAT<br>AAATATTAAATT | 2408          | this study |
| pMPH51     | <i>srv-3p::gfp::cla-1</i>                  | TCACATTTGCCACCAAA<br>TTGCCGGTTGCCA | TTTTGGAGGAGAAAGTT<br>GAGCAAATAGTAG | 770           | this study |
| pMPH52     | <i>sra-6::gfp::cla-1</i>                   | CTGAGGTGCATTTGCGA<br>GGGGCACTTCAGA | GGCAAAATCTGAAATAAT<br>AAATATTAAATT | 2408          | this study |
| pMPH53     | <i>sre-1p::sfGFP</i><br><i>::nrx-1(a)</i>  | GGGCGGGGCTATCTGC<br>AAACAATGCAATGC | GAGGACATTTAAAAACC<br>GGCGAGTATTGTA | 1100          | this study |

|        |                                          |                                    |                                     |      |            |
|--------|------------------------------------------|------------------------------------|-------------------------------------|------|------------|
| pMPH54 | <i>gcy-36p::sfGF<br/>P::nrx-1(α)</i>     | ATGATGTTGGTAGATGG<br>GGTTTGGATTCAT | TGTTGGGTAGCCCTTGT<br>TTGAATTTACCAC  | 1087 | this study |
| pMPH55 | <i>flp-8p::sfGFP<br/>::nrx-1(α)</i>      | AGTGCTCAAATGGAGTC<br>TGCATGAAAATGA | TTTCTACTTGAAAAGTGT<br>GGACTGAGCACT  | 3165 | this study |
| pMPH56 | <i>nlp-56p::sfGF<br/>P::nrx-1(α)</i>     | TTCCAAATCCGAACTTC<br>CAGCTCAAATGAC | CTGGAAGAGTTGAATCA<br>TATGGTTTAGAAG  | 721  | this study |
| pMPH57 | <i>sra-6p::sfGFP<br/>::nlg-1</i>         | CTGAGGTGCATTTGCGA<br>GGGGCACTTCAGA | GGCAAAATCTGAAATAAT<br>AAATATTAAATT  | 2408 | this study |
| pMPH58 | <i>srv-3p::sfGFP<br/>::nlg-1</i>         | TCACATTTGCCACCAAA<br>TTGCCGGTTGCCA | TTTTGGAGGAGAAAAGTT<br>GAGCAAATAGTAG | 770  | this study |
| pMPH59 | <i>ins-1p::sfGFP<br/>::nlg-1</i>         | CTTCCTGTTTCCTGTCC<br>GTTTAAGGATTTA | ACAACGGGCCACACGC<br>TACGACAGTACGCA  | 314  | this study |
| pMPH64 | <i>sra-6p::npr-1::sl2::mC<br/>herry</i>  | CTGAGGTGCATTTGCGA<br>GGGGCACTTCAGA | GGCAAAATCTGAAATAAT<br>AAATATTAAATT  | 2408 | this study |
| pMPH65 | <i>nlp-56p::npr-1::sl2::mC<br/>herry</i> | TTCCAAATCCGAACTTC<br>CAGCTCAAATGAC | CTGGAAGAGTTGAATCA<br>TATGGTTTAGAAG  | 721  | this study |
| pMPH66 | <i>myo-3p::sfGFP<br/>::nlg-1</i>         | GTAATTTATTTAACCTGT<br>ACTCTATCACT  | TTCTAGATGGATCTAGTG<br>GTCGTGGGTTTG  | 2418 | this study |
| pMPH67 | <i>tx-3p::sfGFP<br/>::nlg-1</i>          | TCTCATTTAAATTTTCAGA<br>GCTTAAAAATG | ATTTGACACCGAAGACA<br>ATTATTATGATAA  | 912  | this study |
